# Supplementary material for: GPR15-mediated T cell recruitment during acute viral myocarditis facilitated virus elimination and improved outcome
Source: PubMed Central journal article supplement (PMC11357984; doi:10.1038/s44161-023-00401-z), 2023-12-27
Supplement: 44161_2023_401_MOESM1_ESM.pdf [file 44161_2023_401_MOESM1_ESM.pdf]

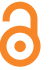

---

# **GPR15-mediated T cell recruitment during acute viral myocarditis facilitated virus elimination and improved outcome**

---

In the format provided by the authors and unedited

---

## Table of contents

|            |                                                                  |           |
|------------|------------------------------------------------------------------|-----------|
| <b>1</b>   | <b>EXPANDED MATERIAL AND METHODS</b>                             | <b>2</b>  |
| <b>1.1</b> | <b>Gene expression analysis using TaqMan</b>                     | <b>2</b>  |
| <b>1.2</b> | <b>Chromogenic Immunohistochemistry</b>                          | <b>5</b>  |
| <b>1.3</b> | <b>RNAscope <i>in situ</i> hybridisation</b>                     | <b>6</b>  |
| <b>1.4</b> | <b>Chemotaxis-assay and analysis of GPR15 expressing T cells</b> | <b>7</b>  |
| <b>1.5</b> | <b>Actin polymerisation assay</b>                                | <b>10</b> |
| <b>1.6</b> | <b>IFN<math>\gamma</math> secretion assay</b>                    | <b>12</b> |
| <b>1.7</b> | <b>T cell activation assay</b>                                   | <b>14</b> |

# 1 Expanded Material and Methods

## 1.1 Gene expression analysis using TaqMan

**Supplementary Table 1:** Gene expression assays purchased from Thermo Fisher Scientific.

| <b>Gene</b>                   | <b>Gene full name</b>                          | <b>Assay ID</b> |
|-------------------------------|------------------------------------------------|-----------------|
| <i>18s</i>                    | Eukaryotic 18S rRNA                            | Hs99999901_s1   |
| <i>Ccl2</i>                   | Chemokine (C-C motif) ligand 2                 | Mm99999056_m1   |
| <i>Ccl5</i>                   | Chemokine (C-C motif) ligand 5                 | Mm01302428_m1   |
| <i>Cd19</i>                   | CD19 antigen                                   | Mm00515420_m1   |
| <i>Cd3</i>                    | CD3 antigen, epsilon polypeptide               | Mm01179194_m1   |
| <i>Cd4</i>                    | CD4 antigen                                    | Mm00442754_m1   |
| <i>Cd68</i>                   | CD68 antigen                                   | Mm03047343_m1   |
| <i>Cd8a</i>                   | CD8 antigen, alpha chain                       | Mm01182107_g1   |
| <i>Cdkn1b</i>                 | Cyclin-dependent kinase inhibitor 1B           | Mm00438167_g1   |
| <i>Cxcl10</i>                 | Chemokine (C-X-C motif) ligand 10              | Mm99999072_m1   |
| <i>Foxp3</i>                  | Forkhead box P3                                | Mm00475162_m1   |
| <i>Gbp6</i>                   | Guanylate binding protein 6                    | Mm00843395_m1   |
| <i>Gpr15</i>                  | G protein-coupled receptor 15                  | Mm03990531_s1   |
| <i>Gpr15l (2610528A11Rik)</i> | G protein-coupled receptor 15 ligand           | Mm01213298_m1   |
| <i>Ifn6</i>                   | Interferon beta 1, fibroblast                  | Mm00439546_s1   |
| <i>Ifny</i>                   | Interferon gamma                               | Mm00801778_m1   |
| <i>Il10</i>                   | Interleukin 10                                 | Mm00439616_m1   |
| <i>Irgm1</i>                  | Immunity-related GTPase family M member 1      | Mm00492596_m1   |
| <i>Parp14</i>                 | Poly (ADP-ribose) polymerase family, member 14 | Mm00520984_m1   |

**Supplementary Table 2:** Components of the CVB3 gene expression assay for random cDNA.

| <b>Assay</b>          | <b>Gene name</b>              | <b>Company</b>    | <b>Final conc.</b> |
|-----------------------|-------------------------------|-------------------|--------------------|
| <b>CVB3_SE</b>        | 5'-CCCTGAATGCGGCTAATCC-3'     | Invitrogen        | 2.5 $\mu$ M        |
| <b>CVB3_AS</b>        | 5'-ATTGTCACCATAAGCAGCCA-3'    | Invitrogen        | 2.5 $\mu$ M        |
| <b>CVB3_FAM_probe</b> | 5'-6-FAM-TGCAGCGGAACCG-MGB-3' | AppliedBiosystems | 0.25 $\mu$ M       |

6-FAM: 6-Carboxyfluorescein; MGB: *minor groove binder*,

**Supplementary Table 3:** Components of the CVB3 gene expression assay for strand-specific cDNA.

| Assay          | Gene name                      | Company           | Final conc.  |
|----------------|--------------------------------|-------------------|--------------|
| CVB3_SE        | 5'-TGAGATAATTGCCCTGAATGCG-3'   | Tib MolBiol       | 2.5 $\mu$ M  |
| CVB3_AS        | 5'-CGCTTGATAGATTGTCACCATAAG-3' | Tib MolBiol       | 2.5 $\mu$ M  |
| CVB3_FAM_probe | 5'-6-FAM-TGCAGCGGAACCG-MGB-3'  | AppliedBiosystems | 0.25 $\mu$ M |

6-FAM: 6-Carboxyfluorescein; MGB: *minor groove binder*.

## 1.2 Chromogenic Immunohistochemistry

**Supplementary Table 4:** Antibodies used for chromogenic immunohistochemistry.

| <b>Target</b>                                          | <b>Species</b> | <b>Dilution</b> | <b>Company</b>    | <b>Order number</b> | <b>Clone</b> |
|--------------------------------------------------------|----------------|-----------------|-------------------|---------------------|--------------|
| CD3                                                    | Rabbit         | 1:50            | Abcam             | Ab16669             | SP7          |
| CD8                                                    | Rabbit         | 1:500           | Synaptic Systems  | HS-361003           | -            |
| Histofine Simple Stain MAX<br>PO (R), anti-rabbit, HRP | Goat           | undiluted       | medac-diagnostika | 414141F             | -            |

### 1.3 RNAscope *in situ* hybridisation

**Supplementary Table 5:** Antibodies, probes, and dyes used for RNAscope *in situ* hybridisation with subsequent immunohistological fluorescent staining.

| <b>Antibody/Reagent/Probe</b>           | <b>Species</b> | <b>Dilution</b> | <b>Company</b>  | <b>Order number</b> |
|-----------------------------------------|----------------|-----------------|-----------------|---------------------|
| Mouse anti-TroponinT                    | Mouse          | 1:1500          | Dianova         | DLN-008802          |
| Donkey anti mouse AlexaFluor488         | Donkey         | 1:500           | Invitrogen      | A21202              |
| Wheat germ agglutinin AlexaFluor633     |                | 1:500           | Invitrogen      | W21404              |
| DAPI Fluoromount-G                      |                | undiluted       | SouthernBiotech | 0100-20             |
| RNAscope® Probe-V-CVB3                  |                | undiluted       | ACD             | 409291              |
| RNAscope® Positive Control Probe-Mm-UBC |                | undiluted       | ACD             | 310771              |
| RNAscope® Negative Control Probe-DapB   |                | undiluted       | ACD             | 310043              |

## 1.4 Chemotaxis-assay and analysis of GPR15 expressing T cells

**Supplementary Table 6:** Primary antibodies with conjugated fluorophores used for FACS / flow cytometry analyses.

| <b>Antibody/Fluorophore</b> | <b>Species</b> | <b>Final concentration</b> | <b>Company</b> | <b>Order number</b> | <b>Clone</b> |
|-----------------------------|----------------|----------------------------|----------------|---------------------|--------------|
| CD4_PE                      | Rat            | 2 ng/ $\mu$ l              | eBioscience    | 12-0042-83          | RM4-5        |
| CD8_APC                     | Rat            | 2 ng/ $\mu$ l              | BioLegend      | 100712              | 53-6.7       |
| CD45_AlexaFluor700          | Rat            | 2 ng/ $\mu$ l              | eBioscience    | 56-0451-82          | 30-F11       |
| CD25_PacificBlue            | Rat            | 2 ng/ $\mu$ l              | BioLegend      | 102021              | PC61         |
| Viability_PacificOrange     | Rat            | 4 ng/ $\mu$ l              | ThermoFisher   | P30253              | -            |



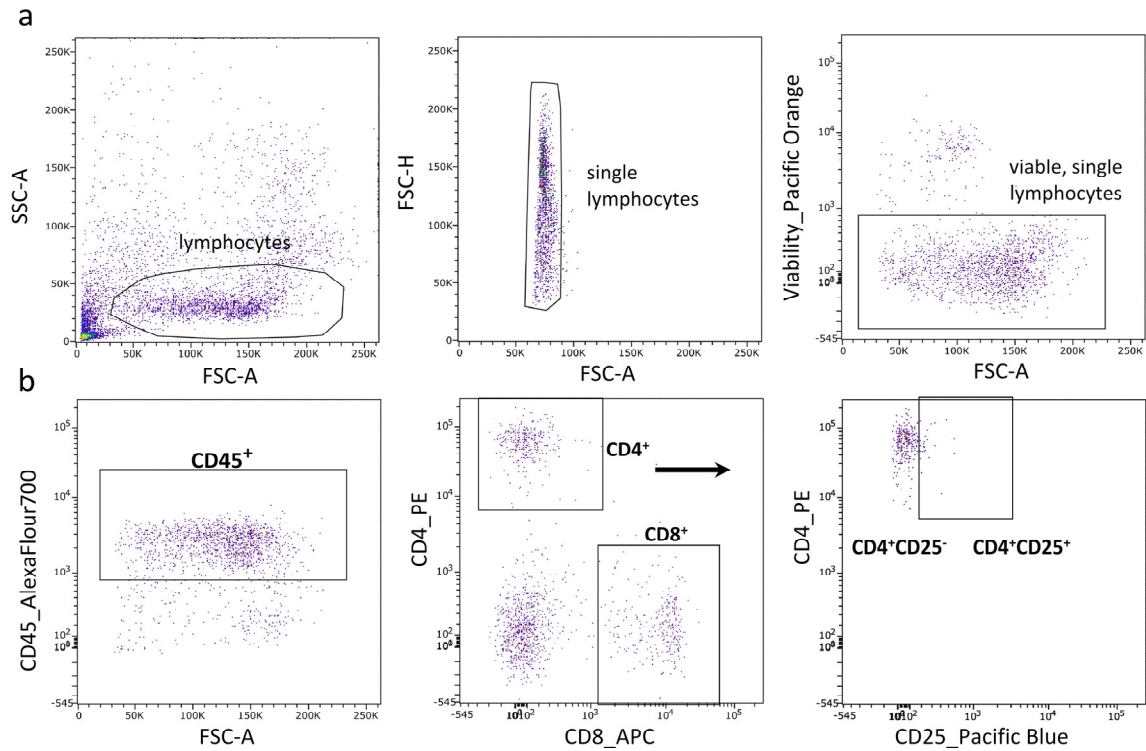

**Supplementary Figure 1: Gating strategy to analyse chemotaxis experiments.** Splenocytes (that had migrated through the pores of the inserts) were analysed via flow cytometry and gated as follows: (a) Lymphocytes were gated via forward (FSC) and sideward scatter (SSC) and then duplicates were excluded. Dead lymphocytes were excluded using Pacific Orange. (b) Based on the obtained cell population, the following immune cell subtypes were identified with primary fluorescence-labelled antibodies: CD45<sup>+</sup> lymphocytes, CD8<sup>+</sup> T<sub>C</sub>, CD4<sup>+</sup>CD25<sup>-</sup> T<sub>H</sub> and CD4<sup>+</sup>CD25<sup>+</sup> T<sub>reg</sub> cells.

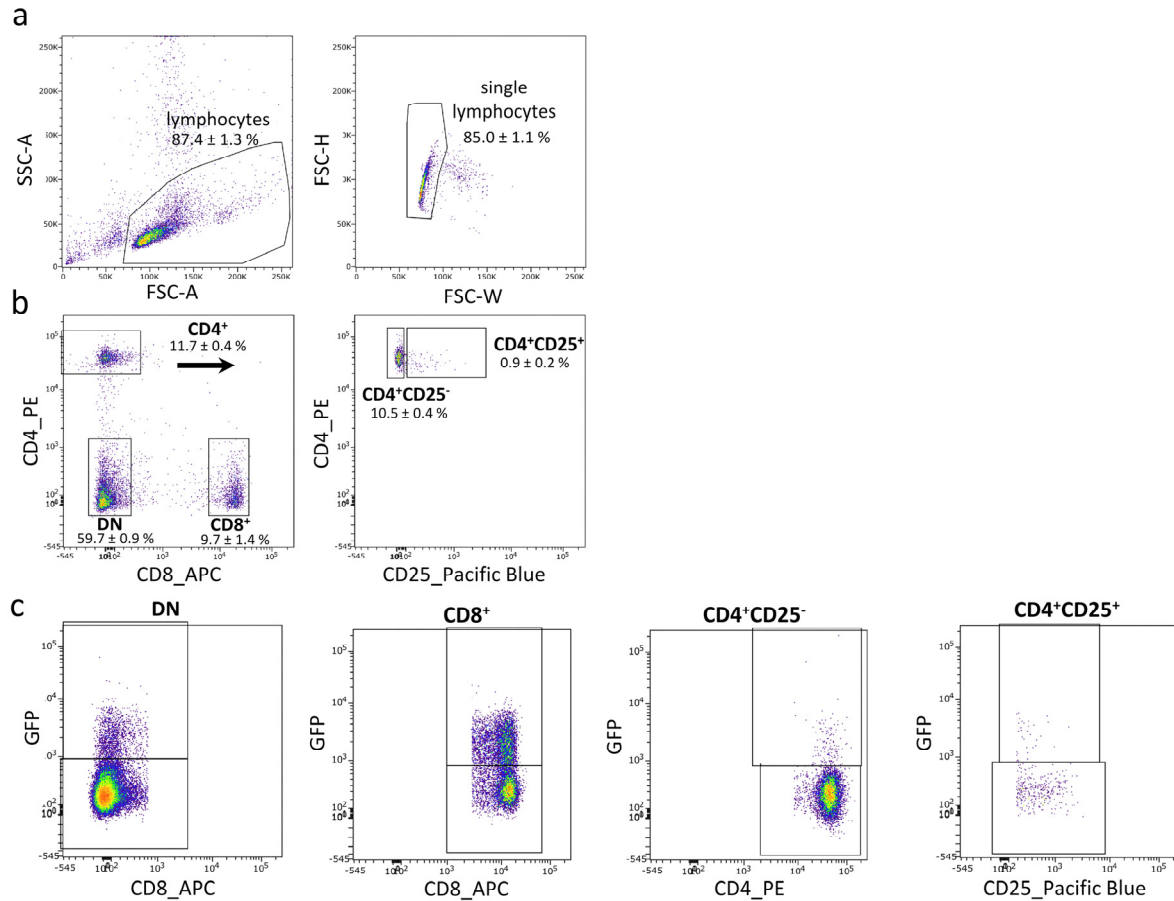

**Supplementary Figure 2: Gating strategy to sort splenocytes or to quantify GFP<sup>+</sup> cells.** Splenocytes were sorted via FACS or analysed via flow cytometry as follows: (a) Lymphocytes were gated via forward (FSC) and sideward scatter (SSC) and duplicates were excluded. (b) Based on the obtained cell population of single lymphocytes, the following immune cell subtypes were sorted with primary fluorescence-labelled antibodies: double negative (CD4<sup>+</sup>CD8<sup>-</sup>, DN), lymphocytes, CD8<sup>+</sup> T<sub>C</sub>, CD4<sup>+</sup>CD25<sup>-</sup> T<sub>H</sub> and CD4<sup>+</sup>CD25<sup>+</sup> T<sub>reg</sub> cells. The percentage of the gated population is given as mean ± standard deviation. (c) Based on the gating strategy from A and B, GFP<sup>+</sup> cells were counted in the four groups: DN, CD8<sup>+</sup>, CD4<sup>+</sup>CD25<sup>-</sup> and CD4<sup>+</sup>CD25<sup>+</sup> cells.

## 1.5 Actin polymerisation assay

**Supplementary Table 7:** Primary antibodies with conjugated fluorophores used for extracellular staining after phalloidin assay.

| Antibody/Fluorophore  | Species | Final concentration | Company     | Order number | Clone   |
|-----------------------|---------|---------------------|-------------|--------------|---------|
| Phalloidin-iFluor 488 |         | 1x                  | Abcam       | ab176753     |         |
| CD11b_PE-Cy7          | Rat     | 0.4 ng/ $\mu$ l     | BioLegend   | 101216       | M1/70   |
| CD45_PerCP            | Rat     | 0.4 ng/ $\mu$ l     | BioLegend   | 103132       | 30-F11  |
| TCRb_APC-eF780 or     | Rat     | 0.4 ng/ $\mu$ l     | eBioscience | 47-5961-82   | H57-597 |
| CD3_APC               | Rat     | 0.4 ng/ $\mu$ l     | BioLegend   | 100236       | 17A2    |
| CD4_APC or            | Rat     | 0.6 ng/ $\mu$ l     | BioLegend   | 100516       | RM4-5   |
| CD4_PerCP-Cy5.5       | Rat     | 0.6 ng/ $\mu$ l     | BioLegend   | 100431       | GK1.5   |
| CD8a_BV421            | Rat     | 0.4 ng/ $\mu$ l     | BioLegend   | 100753       | 53-6.7  |
| CD25_PE               | Rat     | 1 ng/ $\mu$ l       | Invitrogen  | 12-0251-82   | PC61.5  |
| Viability_eFluor506   |         | 0.1%                | eBioscience | 65-0866-14   |         |

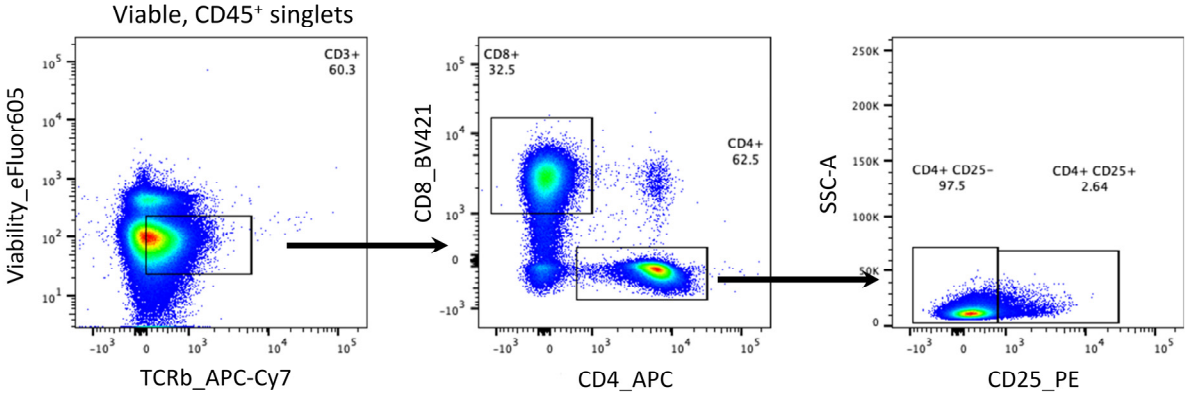

**Supplementary Figure 3: Gating strategy to gate T cell subsets after phalloidin assay.** Viable T cells were separated in CD8<sup>+</sup> and CD4<sup>+</sup> cells, which were further subdivided in CD4<sup>+</sup>CD25<sup>+</sup> and CD4<sup>+</sup>CD25<sup>-</sup> cells.

## 1.6 IFN $\gamma$ secretion assay

**Supplementary Table 8:** Primary antibodies with conjugated fluorophores used for interferon secretion assay.

| <b>Antibody/Fluorophore</b> | <b>Species</b> | <b>Final concentration</b> | <b>Company</b> | <b>Order number</b> | <b>Clone</b> |
|-----------------------------|----------------|----------------------------|----------------|---------------------|--------------|
| CD8_PerCP-Cy5.5             | Rat            | 1 ng/ $\mu$ l              | BioLegend      | 100734              | 53-6.7       |
| CD3_FITC                    | Rat            | 2.5 ng/ $\mu$ l            | BioLegend      | 100204              | 17A2         |
| CD25_APC                    | Rat            | 1 ng/ $\mu$ l              | BioLegend      | 102012              | PC61         |
| CD45_PE-Cy7                 | Rat            | 1 ng/ $\mu$ l              | BD             | 552848              | 30-F11       |
| CD4_BV421                   | Rat            | 1 ng/ $\mu$ l              | BioLegend      | 100443              | GK1.5        |
| Viability_eFluor506         |                | 0.1%                       | eBioscience    | 65-0866-14          |              |

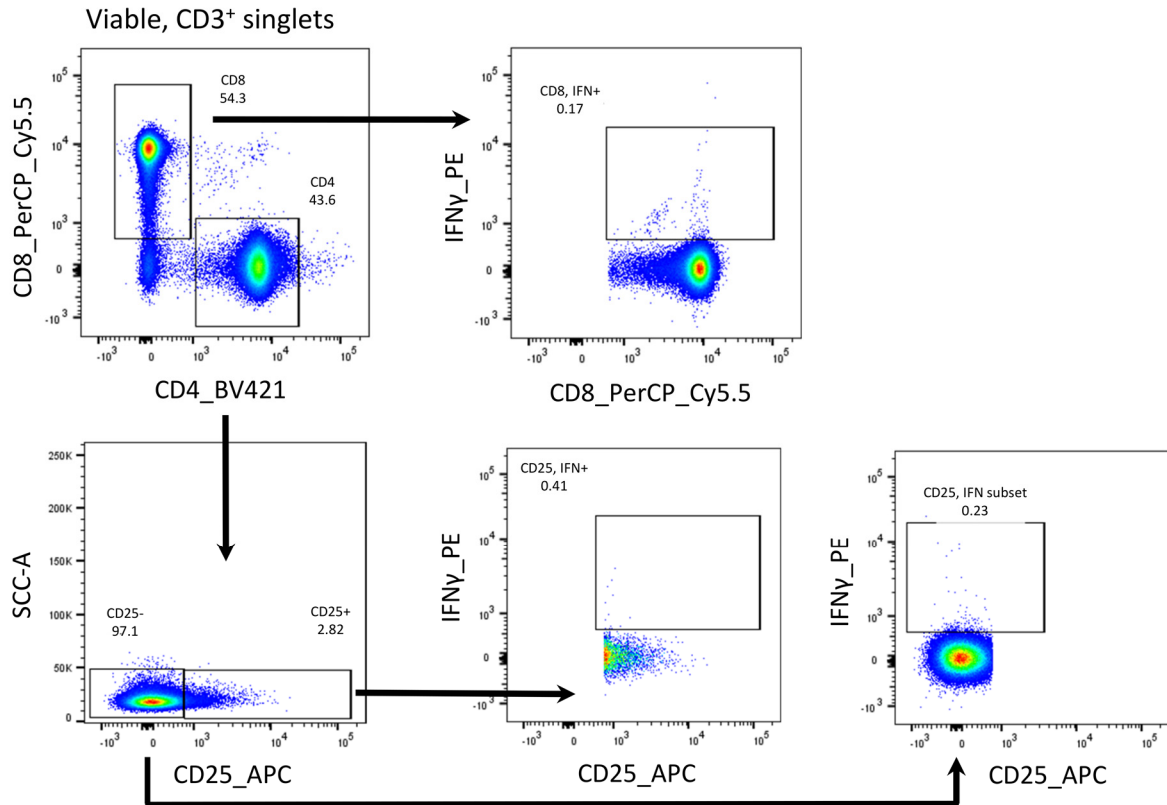

**Supplementary Figure 4: Gating strategy to gate T cell subsets after IFN $\gamma$  secretion assay.** Viable CD3<sup>+</sup> T cell singlets were separated in CD8<sup>+</sup> and CD4<sup>+</sup> cells, which were further subdivided in CD4<sup>+</sup>CD25<sup>+</sup> and CD4<sup>+</sup>CD25<sup>-</sup> cells. For each T cell subsets, proportion of IFN $\gamma$ <sup>+</sup> cells was determined.

## 1.7 T cell activation assay

**Supplementary Table 9:** Primary antibodies with conjugated fluorophores used for extracellular staining.

| Antibody/Fluorophore | Species          | Final concentration | Company     | Order number | Clone   |
|----------------------|------------------|---------------------|-------------|--------------|---------|
| CD45_PerCP           | Rat              | 2 ng/ $\mu$ l       | BioLegend   | 103132       | 30-F11  |
| CD11b_AF700          | Rat              | 5 ng/ $\mu$ l       | BioLegend   | 101222       | M1/70   |
| CD11c_AF700          | Armenian hamster | 5 ng/ $\mu$ l       | BioLegend   | 117320       | N418    |
| CD19_AF700           | Rat              | 5 ng/ $\mu$ l       | BioLegend   | 115528       | 6D5     |
| F4/80_AF700          | Rat              | 5 ng/ $\mu$ l       | BioLegend   | 123130       | BM8     |
| Ly6G_AF700           | Rat              | 5 ng/ $\mu$ l       | BioLegend   | 127622       | 1A8     |
| TER-119_AF700        | Rat              | 5 ng/ $\mu$ l       | BioLegend   | 116220       | TER-119 |
| CD3_APC              | Rat              | 2 ng/ $\mu$ l       | BioLegend   | 100236       | 17A2    |
| FR4_PE-Cy7           | Rat              | 2 ng/ $\mu$ l       | BioLegend   | 125012       | 12A5    |
| CD4_PE/Dazzle        | Rat              | 2 ng/ $\mu$ l       | BioLegend   | 100566       | RM4-5   |
| CD25_PE              | Rat              | 4 ng/ $\mu$ l       | eBioscience | 12-0251-82   | PC61.5  |
| CD8a_BV421           | Rat              | 2 ng/ $\mu$ l       | BioLegend   | 100753       | 53-6.7  |
| Viability_APC-Cy7    |                  | 0.1%                | eBioscience | 65-0865-18   | -       |

**Supplementary Table 10:** Primary antibodies with conjugated fluorophores used for intracellular staining.

| <b>Antibody/Fluorophore</b> | <b>Species</b> | <b>Final concentration</b> | <b>Company</b> | <b>Order number</b> | <b>Clone</b> |
|-----------------------------|----------------|----------------------------|----------------|---------------------|--------------|
| GranzB_FITC                 | Mouse          | 4 ng/ $\mu$ l              | BioLegend      | 372206              | QA16A02      |
| IL-17_BV785                 | Rat            | 4 ng/ $\mu$ l              | BioLegend      | 506928              | TC11-18H10.1 |
| IFN $\gamma$ _BV711         | Rat            | 4 ng/ $\mu$ l              | BioLegend      | 505836              | XMG1.2       |
| TNF $\alpha$ _BV650         | Rat            | 4 ng/ $\mu$ l              | BioLegend      | 506333              | MP6-XT22     |
| IL-10_BV605                 | Rat            | 4 ng/ $\mu$ l              | BioLegend      | 505031              | JES5-16E3    |



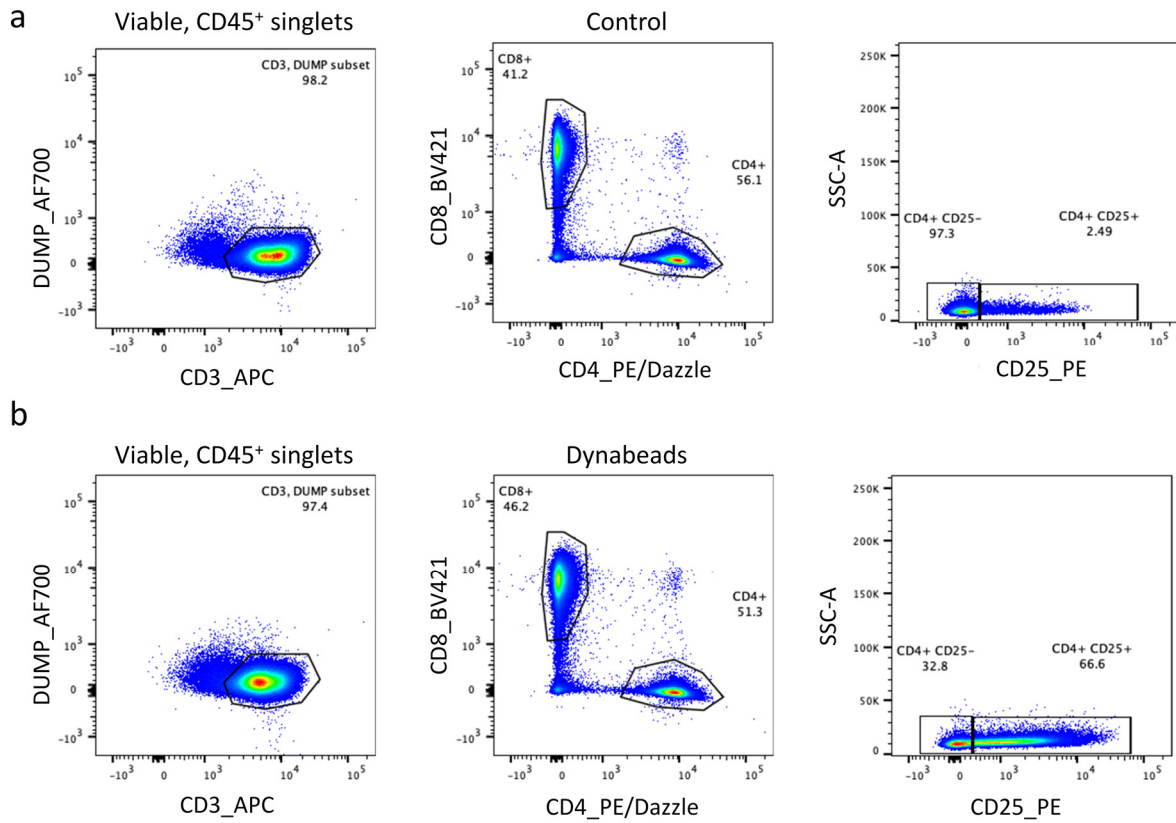

**Supplementary Figure 5: Gating strategy to gate T cell subsets after stimulation with Dynabeads and GPR15L.** Viable T cells were separated in CD8<sup>+</sup> and CD4<sup>+</sup> cells, which were further subdivided in CD4<sup>+</sup>CD25<sup>+</sup> and CD4<sup>+</sup>CD25<sup>-</sup> cells.
