# Supplementary material for: GPR15-mediated T cell recruitment during acute viral myocarditis facilitated virus elimination and improved outcome
Source: PubMed Central journal article supplement (PMC11357984; doi:10.1038/s44161-023-00401-z), 2023-12-27
Supplement: 44161_2023_401_MOESM2_ESM.pdf [file 44161_2023_401_MOESM2_ESM.pdf]

## Reporting Summary

Nature Portfolio wishes to improve the reproducibility of the work that we publish. This form provides structure for consistency and transparency in reporting. For further information on Nature Portfolio policies, see our [Editorial Policies](#) and the [Editorial Policy Checklist](#).

### Statistics

For all statistical analyses, confirm that the following items are present in the figure legend, table legend, main text, or Methods section.

- | n/a                                 | Confirmed                                                                                                                                                                                                                                                                                      |
|-------------------------------------|------------------------------------------------------------------------------------------------------------------------------------------------------------------------------------------------------------------------------------------------------------------------------------------------|
| <input type="checkbox"/>            | <input checked="" type="checkbox"/> The exact sample size ( $n$ ) for each experimental group/condition, given as a discrete number and unit of measurement                                                                                                                                    |
| <input type="checkbox"/>            | <input checked="" type="checkbox"/> A statement on whether measurements were taken from distinct samples or whether the same sample was measured repeatedly                                                                                                                                    |
| <input type="checkbox"/>            | <input checked="" type="checkbox"/> The statistical test(s) used AND whether they are one- or two-sided<br><i>Only common tests should be described solely by name; describe more complex techniques in the Methods section.</i>                                                               |
| <input checked="" type="checkbox"/> | <input type="checkbox"/> A description of all covariates tested                                                                                                                                                                                                                                |
| <input type="checkbox"/>            | <input checked="" type="checkbox"/> A description of any assumptions or corrections, such as tests of normality and adjustment for multiple comparisons                                                                                                                                        |
| <input type="checkbox"/>            | <input checked="" type="checkbox"/> A full description of the statistical parameters including central tendency (e.g. means) or other basic estimates (e.g. regression coefficient) AND variation (e.g. standard deviation) or associated estimates of uncertainty (e.g. confidence intervals) |
| <input type="checkbox"/>            | <input checked="" type="checkbox"/> For null hypothesis testing, the test statistic (e.g. $F$ , $t$ , $r$ ) with confidence intervals, effect sizes, degrees of freedom and $P$ value noted<br><i>Give <math>P</math> values as exact values whenever suitable.</i>                            |
| <input checked="" type="checkbox"/> | <input type="checkbox"/> For Bayesian analysis, information on the choice of priors and Markov chain Monte Carlo settings                                                                                                                                                                      |
| <input checked="" type="checkbox"/> | <input type="checkbox"/> For hierarchical and complex designs, identification of the appropriate level for tests and full reporting of outcomes                                                                                                                                                |
| <input checked="" type="checkbox"/> | <input type="checkbox"/> Estimates of effect sizes (e.g. Cohen's $d$ , Pearson's $r$ ), indicating how they were calculated                                                                                                                                                                    |

*Our web collection on [statistics for biologists](#) contains articles on many of the points above.*

### Software and code

Policy information about [availability of computer code](#)

Data collection

Data analysis

For manuscripts utilizing custom algorithms or software that are central to the research but not yet described in published literature, software must be made available to editors and reviewers. We strongly encourage code deposition in a community repository (e.g. GitHub). See the Nature Portfolio [guidelines for submitting code & software](#) for further information.

### Data

Policy information about [availability of data](#)

All manuscripts must include a [data availability statement](#). This statement should provide the following information, where applicable:

- Accession codes, unique identifiers, or web links for publicly available datasets
- A description of any restrictions on data availability
- For clinical datasets or third party data, please ensure that the statement adheres to our [policy](#)

All data generated during and/or analysed during the current study are included in the main article and associated files or are available from the corresponding author on reasonable request.

## Research involving human participants, their data, or biological material

Policy information about studies with [human participants or human data](#). See also policy information about [sex, gender \(identity/presentation\), and sexual orientation](#) and [race, ethnicity and racism](#).

|                                                                    |     |
|--------------------------------------------------------------------|-----|
| Reporting on sex and gender                                        | N/A |
| Reporting on race, ethnicity, or other socially relevant groupings | N/A |
| Population characteristics                                         | N/A |
| Recruitment                                                        | N/A |
| Ethics oversight                                                   | N/A |

Note that full information on the approval of the study protocol must also be provided in the manuscript.

## Field-specific reporting

Please select the one below that is the best fit for your research. If you are not sure, read the appropriate sections before making your selection.

Life sciences  Behavioural & social sciences  Ecological, evolutionary & environmental sciences

For a reference copy of the document with all sections, see [nature.com/documents/nr-reporting-summary-flat.pdf](https://nature.com/documents/nr-reporting-summary-flat.pdf)

## Life sciences study design

All studies must disclose on these points even when the disclosure is negative.

|                 |                                                                                                                                                                                                                                                                                                                                                                                                                                                                                                                                                                                                                                                                                                                               |
|-----------------|-------------------------------------------------------------------------------------------------------------------------------------------------------------------------------------------------------------------------------------------------------------------------------------------------------------------------------------------------------------------------------------------------------------------------------------------------------------------------------------------------------------------------------------------------------------------------------------------------------------------------------------------------------------------------------------------------------------------------------|
| Sample size     | Our published data were used to determine the variability and expected changes of the study and those values were used to calculate the sample size by G*Power Version 3.1.9.7                                                                                                                                                                                                                                                                                                                                                                                                                                                                                                                                                |
| Data exclusions | Mice were excluded from the analyses, if they did not exhibit virus load in blood at day 4 p.i. and in LV tissue later. They were and was therefore excluded from the study. Mice with too deep anaesthesia or excessive bleeding during the haemodynamic measurement were excluded from the analysis. Exclusions were clearly described throughout the manuscript. For chromogenic immunohistological staining and subsequent quantification of CD3+ and CD8+ T cells in LV tissue, for 1 GPR15-deficient CVB3 infected mouse (5d) FFPE tissue was not collected and therefore not available. Furthermore, for 1 GPR15-deficient CVB3 infected mouse (5d) and 1 WT CVB3 infected mouse (5d) CD8 staining was not successful. |
| Replication     | Reproducibility of experimental findings was corroborated in independent experiments. We were able to produce similar results in the independent mouse experiments. The individual captions in the main text indicate the number of times each experiment was replicated or performed independently.                                                                                                                                                                                                                                                                                                                                                                                                                          |
| Randomization   | KO and WT mice were randomly subjected to either CVB3 or NaCl injection. Whenever possible isolated cells or cell lines were pooled prior to following treatment to avoid changes during isolation or proliferation.                                                                                                                                                                                                                                                                                                                                                                                                                                                                                                          |
| Blinding        | All investigators were blinded to the group or genotype of analyzed tissue. During heart function measurements infected mice were clearly discriminable from healthy mice, however genotype was blinded. For in vitro studies, investigators were unblinded since the same investigators both conducted and analyzed the experiments. Blinding was not relevant for FACS experiments because the same gating strategies were used for all samples during analysis.                                                                                                                                                                                                                                                            |

## Reporting for specific materials, systems and methods

We require information from authors about some types of materials, experimental systems and methods used in many studies. Here, indicate whether each material, system or method listed is relevant to your study. If you are not sure if a list item applies to your research, read the appropriate section before selecting a response.

## Materials &amp; experimental systems

|                                     |                                     |                               |
|-------------------------------------|-------------------------------------|-------------------------------|
| n/a                                 | <input type="checkbox"/>            | Involved in the study         |
| <input type="checkbox"/>            | <input checked="" type="checkbox"/> | Antibodies                    |
| <input type="checkbox"/>            | <input checked="" type="checkbox"/> | Eukaryotic cell lines         |
| <input checked="" type="checkbox"/> | <input type="checkbox"/>            | Palaeontology and archaeology |
| <input type="checkbox"/>            | <input checked="" type="checkbox"/> | Animals and other organisms   |
| <input checked="" type="checkbox"/> | <input type="checkbox"/>            | Clinical data                 |
| <input checked="" type="checkbox"/> | <input type="checkbox"/>            | Dual use research of concern  |
| <input checked="" type="checkbox"/> | <input type="checkbox"/>            | Plants                        |

## Methods

|                                     |                                     |                        |
|-------------------------------------|-------------------------------------|------------------------|
| n/a                                 | <input type="checkbox"/>            | Involved in the study  |
| <input checked="" type="checkbox"/> | <input type="checkbox"/>            | ChIP-seq               |
| <input type="checkbox"/>            | <input checked="" type="checkbox"/> | Flow cytometry         |
| <input checked="" type="checkbox"/> | <input type="checkbox"/>            | MRI-based neuroimaging |

## Antibodies

## Antibodies used

For FcγR blocking, 500 ng/ml anti-CD16/CD32 monoclonal antibody was used (clone 2.4G2, BioXcell, BE0008). All other antibodies (clones, sources and dilutions) are described in the supplemental tables S4, S5, S6, S7, S8, S9 and S10 of the paper.

## Validation

All antibodies used in the manuscript have been validated commercially and in our hands using appropriate positive and negative controls.

anti-CD16/CD32 monoclonal antibody (clone 2.4G2, BioXcell, BE0008); Trefzer A et al. 2021, Cell Reports, PMID:108748; Pezoldt J et al. Nat Commun 13, 7227 (2022). <https://doi.org/10.1038/s41467-022-34868-4>

CD3 (ab16669): <https://www.abcam.com/products/primary-antibodies/cd3-epsilon-antibody-sp7-ab16669.html>

CD8 (HS-361003): <https://sysy.com/product/HS-361003>

Donkey anti mouse AlexaFluor488 (A21202): [https://www.thermofisher.com/order/genome-database/dataSheetPdf?producttype=antibody&productsubtype=antibody\\_secondary&productId=A-21202&version=359](https://www.thermofisher.com/order/genome-database/dataSheetPdf?producttype=antibody&productsubtype=antibody_secondary&productId=A-21202&version=359)

Wheat germ agglutinin AlexaFluor633 (W21404): <https://www.thermofisher.com/order/catalog/product/de/de/W21404>

CD4\_PE (12-0042-83): [https://www.thermofisher.com/order/genome-database/dataSheetPdf?producttype=antibody&productsubtype=antibody\\_primary&productId=12-0042-82&version=359](https://www.thermofisher.com/order/genome-database/dataSheetPdf?producttype=antibody&productsubtype=antibody_primary&productId=12-0042-82&version=359)

CD8 (100712): <https://www.biolegend.com/en-us/products/apc-anti-mouse-cd8a-antibody-150?pdf=true&displayInline=true&leftRightMargin=15&topBottomMargin=15&filename=APC%20anti-mouse%20CD8a%20Antibody.pdf&v=20230714033116>

CD45\_AlexaFluor700 (56-0451-82): [https://www.thermofisher.com/order/genome-database/dataSheetPdf?producttype=antibody&productsubtype=antibody\\_primary&productId=56-0451-82&version=359](https://www.thermofisher.com/order/genome-database/dataSheetPdf?producttype=antibody&productsubtype=antibody_primary&productId=56-0451-82&version=359)

CD25\_PacificBlue (102021): <https://d1spbj2x7qk4bg.cloudfront.net/en-ie/products/pacific-blue-anti-mouse-cd25-antibody-3315?pdf=true&displayInline=true&leftRightMargin=15&topBottomMargin=15&filename=Pacific%20Blue%E2%84%A2%20anti-mouse%20CD25%20Antibody.pdf&v=20230714033116>

Viability\_PacificOrange (P30253): <https://www.thermofisher.com/order/catalog/product/de/de/P30253>

Phalloidin-iFluor 488 (ab176753): <https://www.abcam.com/products/chip-kits/phalloidin-ifluor-488-reagent-ab176753.html>

CD11b\_Cy7 (101216): <https://www.biolegend.com/en-de/cell-health/pe-cyanine7-anti-mouse-human-cd11b-antibody-1921?pdf=true&displayInline=true&leftRightMargin=15&topBottomMargin=15&filename=PE/Cyanine7%20anti-mouse/human%20CD11b%20Antibody.pdf&v=20230726063409>

CD45\_PerCP (103132): <https://d1spbj2x7qk4bg.cloudfront.net/en-gb/products/percp-cyanine5-5-anti-mouse-cd45-antibody-4264?pdf=true&displayInline=true&leftRightMargin=15&topBottomMargin=15&filename=PerCP/Cyanine5.5%20anti-mouse%20CD45%20Antibody.pdf&v=20230114013553>

TCRb\_APC-eFluor™ 780(47-5961-82): [https://www.thermofisher.com/order/genome-database/dataSheetPdf?producttype=antibody&productsubtype=antibody\\_primary&productId=47-5961-82&version=359](https://www.thermofisher.com/order/genome-database/dataSheetPdf?producttype=antibody&productsubtype=antibody_primary&productId=47-5961-82&version=359)

CD3\_APC (100236): <https://d1spbj2x7qk4bg.cloudfront.net/fr-ch/products/apc-anti-mouse-cd3-antibody-8055?pdf=true&displayInline=true&leftRightMargin=15&topBottomMargin=15&filename=APC%20anti-mouse%20CD3%20Antibody.pdf&v=20230726063409>

CD4\_APC (100516): <https://d1spbj2x7qk4bg.cloudfront.net/ja-jp/products/apc-anti-mouse-cd4-antibody-477?pdf=true&displayInline=true&leftRightMargin=15&topBottomMargin=15&filename=APC%20anti-mouse%20CD4%20Antibody.pdf&v=20230726063409>

CD4\_PerCP-Cy5.5 (100431): <https://d1spbj2x7qk4bg.cloudfront.net/ja-jp/products/percp-anti-mouse-cd4-antibody-4219?pdf=true&displayInline=true&leftRightMargin=15&topBottomMargin=15&filename=PerCP%20anti-mouse%20CD4%20Antibody.pdf&v=20220421053143>

CD8a\_BV421 (100753): <https://d1spbj2x7qk4bg.cloudfront.net/nl-nl/products/brilliant-violet-421-anti-mouse-cd8a-antibody-7138?pdf=true&displayInline=true&leftRightMargin=15&topBottomMargin=15&filename=Brilliant%20Violet%20421%E2%84%A2%20anti-mouse%20CD8a%20Antibody.pdf&v=20230920123134>

CD25\_PE (12-0251-82): [https://www.thermofisher.com/order/genome-database/dataSheetPdf?producttype=antibody&productsubtype=antibody\\_primary&productId=12-0251-82&version=359](https://www.thermofisher.com/order/genome-database/dataSheetPdf?producttype=antibody&productsubtype=antibody_primary&productId=12-0251-82&version=359)

Viability\_eFluor506 (65-0866-14): <https://www.thermofisher.com/order/catalog/product/de/de/65-0866-14>

CD8\_PerCP-Cy5.5 (100734): <https://d1spbj2x7qk4bg.cloudfront.net/en-ie/products/percp-cyanine5-5-anti-mouse-cd8a-antibody-4255?pdf=true&displayInline=true&leftRightMargin=15&topBottomMargin=15&filename=PerCP/Cyanine5.5%20anti-mouse%20CD8a%20Antibody.pdf&v=20230714033116>

CD3\_FITC (100204): <https://www.biolegend.com/en-de/explore-new-products/fitc-anti-mouse-cd3-antibody-45?GroupID=BLG6732>

CD25\_APC (102012): <https://d1spbj2x7qk4bg.cloudfront.net/fr-lu/products/apc-anti-mouse-cd25-antibody-420?pdf=true&displayInline=true&leftRightMargin=15&topBottomMargin=15&filename=APC%20anti-mouse%20CD25%20Antibody.pdf&v=20231114073227>

CD45\_PE-Cy7 (552848): <https://wwwbdbiosciences.com/en-us/products/reagents/flow-cytometry-reagents/research-reagents/single-color-antibodies-ruo/pe-cy-7-rat-anti-mouse-cd45.552848>

CD4\_BV421 (100443): <https://www.biolegend.com/en-us/search-results/brilliant-violet-421-anti-mouse-cd4-antibody-7142?>

pdf=true&displayInline=true&leftRightMargin=15&topBottomMargin=15&filename=Brilliant%20Violet%20421%E2%84%A2%20anti-mouse%20CD4%20Antibody.pdf&v=20230803063053  
 CD45\_PerCP (103132): <https://d1spbj2x7qk4bg.cloudfront.net/en-gb/products/percp-cyanine5-5-anti-mouse-cd45-antibody-4264?pdf=true&displayInline=true&leftRightMargin=15&topBottomMargin=15&filename=PerCP/Cyanine5.5%20anti-mouse%20CD45%20Antibody.pdf&v=20230114013553>  
 CD11b\_AF700 (101222): <https://www.biolegend.com/en-us/search-results/alexa-fluor-700-anti-mouse-human-cd11b-antibody-3388?pdf=true&displayInline=true&leftRightMargin=15&topBottomMargin=15&filename=Alexa%20Fluor%20AE%20700%20anti-mouse/human%20CD11b%20Antibody.pdf&v=20230726063409>  
 CD11c\_AF700 (117320): <https://d1spbj2x7qk4bg.cloudfront.net/fr-lu/products/alexa-fluor-700-anti-mouse-cd11c-antibody-3429?pdf=true&displayInline=true&leftRightMargin=15&topBottomMargin=15&filename=Alexa%20Fluor%20AE%20700%20anti-mouse%20CD11c%20Antibody.pdf&v=20231114073227>  
 CD19\_AF700 (115528): <https://www.biolegend.com/de-de/cell-health/alexa-fluor-700-anti-mouse-cd19-antibody-3391?pdf=true&displayInline=true&leftRightMargin=15&topBottomMargin=15&filename=Alexa%20Fluor%20AE%20700%20anti-mouse%20CD19%20Antibody.pdf&v=20230714033116>  
 F4/80\_AF700 (123130): <https://d1spbj2x7qk4bg.cloudfront.net/en-gb/products/alexa-fluor-700-anti-mouse-f4-80-antibody-6556?pdf=true&displayInline=true&leftRightMargin=15&topBottomMargin=15&filename=Alexa%20Fluor%20AE%20700%20anti-mouse%20F4/80%20Antibody.pdf&v=20230114013553>  
 Ly6G\_AF700 (127622): <https://d1spbj2x7qk4bg.cloudfront.net/fr-lu/products/alexa-fluor-700-anti-mouse-ly-6g-antibody-6754?pdf=true&displayInline=true&leftRightMargin=15&topBottomMargin=15&filename=Alexa%20Fluor%20AE%20700%20anti-mouse%20Ly-6G%20Antibody.pdf&v=20230801063041>  
 TER-119\_AF700 (116220): <https://d1spbj2x7qk4bg.cloudfront.net/de-de/products/alexa-fluor-700-anti-mouse-ter-119-erythroid-cells-antibody-3428?pdf=true&displayInline=true&leftRightMargin=15&topBottomMargin=15&filename=Alexa%20Fluor%20AE%20700%20anti-mouse%20TER-119/Erythroid%20Cells%20Antibody.pdf&v=20230701123045>  
 FR4\_PE-Cy7 (125012): [https://d1spbj2x7qk4bg.cloudfront.net/de-de/products/pe-cyanine7-anti-mouse-fr4-folate-receptor-4-antibody-4924?pdf=true&displayInline=true&leftRightMargin=15&topBottomMargin=15&filename=PE/Cyanine7%20anti-mouse%20FR4%20\(Folate%20Receptor%204\)%20Antibody.pdf&v=20231114073227](https://d1spbj2x7qk4bg.cloudfront.net/de-de/products/pe-cyanine7-anti-mouse-fr4-folate-receptor-4-antibody-4924?pdf=true&displayInline=true&leftRightMargin=15&topBottomMargin=15&filename=PE/Cyanine7%20anti-mouse%20FR4%20(Folate%20Receptor%204)%20Antibody.pdf&v=20231114073227)  
 CD4\_PE/Dazzle (100566): <https://d1spbj2x7qk4bg.cloudfront.net/de-de/products/pe-dazzle-594-anti-mouse-cd4-antibody-9845?pdf=true&displayInline=true&leftRightMargin=15&topBottomMargin=15&filename=PE/Dazzle%20AE%20594%20anti-mouse%20CD4%20Antibody.pdf&v=20230223043110>  
 Viability\_APC-Cy7 (65-0865-18): <https://www.thermofisher.com/order/catalog/product/de/de/65-0865-18>  
 GranzB\_FITC (372206): <https://d1spbj2x7qk4bg.cloudfront.net/en-gb/products/fitc-anti-human-mouse-granzyme-b-recombinant-antibody-14430?pdf=true&displayInline=true&leftRightMargin=15&topBottomMargin=15&filename=FITC%20anti-human/mouse%20Granzyme%20B%20Recombinant%20Antibody.pdf&v=20221115073101>  
 IL-17\_BV785 (506928): <https://d1spbj2x7qk4bg.cloudfront.net/de-de/products/brilliant-violet-785-anti-mouse-il-17a-antibody-7988?pdf=true&displayInline=true&leftRightMargin=15&topBottomMargin=15&filename=Brilliant%20Violet%20785%E2%84%A2%20anti-mouse%20IL-17A%20Antibody.pdf&v=20230114013553>  
 IFN $\gamma$ \_BV711 (505836): <https://d1spbj2x7qk4bg.cloudfront.net/en-gb/search-results/brilliant-violet-711-anti-mouse-ifn-gamma-antibody-7950?pdf=true&displayInline=true&leftRightMargin=15&topBottomMargin=15&filename=Brilliant%20Violet%20711%E2%84%A2%20anti-mouse%20IFN-%CE%B3%20Antibody.pdf&v=20230726063409>  
 TNF $\alpha$ \_BV650 (506333): <https://d1spbj2x7qk4bg.cloudfront.net/fr-lu/products/brilliant-violet-650-anti-mouse-tnf-alpha-antibody-8829?pdf=true&displayInline=true&leftRightMargin=15&topBottomMargin=15&filename=Brilliant%20Violet%20650%E2%84%A2%20anti-mouse%20TNF-%CE%B1%20Antibody.pdf&v=20230803063053>  
 IL-10\_BV605 (505031): <https://d1spbj2x7qk4bg.cloudfront.net/en-gb/products/brilliant-violet-605-anti-mouse-il-10-antibody-9382?pdf=true&displayInline=true&leftRightMargin=15&topBottomMargin=15&filename=Brilliant%20Violet%20605%E2%84%A2%20anti-mouse%20IL-10%20Antibody.pdf&v=20230105073058>

## Eukaryotic cell lines

Policy information about [cell lines and Sex and Gender in Research](#)

|                                                                      |                                                                                                                                                |
|----------------------------------------------------------------------|------------------------------------------------------------------------------------------------------------------------------------------------|
| Cell line source(s)                                                  | MHEC5-T were purchased from DSMZ (ACC 336).<br>HL1 were purchased from Merck (SCC065).                                                         |
| Authentication                                                       | Cell lines were purchased from DSMZ (MHEC5-T) and Merck (HL1). Morphological assessment via microscopy was used to ensure origin of cell line. |
| Mycoplasma contamination                                             | no mycoplasma contamination tested.                                                                                                            |
| Commonly misidentified lines<br>(See <a href="#">ICLAC</a> register) | Commonly misidentified cell lines were not used in this study.                                                                                 |

## Animals and other research organisms

Policy information about [studies involving animals; ARRIVE guidelines](#) recommended for reporting animal research, and [Sex and Gender in Research](#)

|                    |                                                                                                                                                                                                                                                                                                                                                                                                                                                                                                                                                                                                      |
|--------------------|------------------------------------------------------------------------------------------------------------------------------------------------------------------------------------------------------------------------------------------------------------------------------------------------------------------------------------------------------------------------------------------------------------------------------------------------------------------------------------------------------------------------------------------------------------------------------------------------------|
| Laboratory animals | We used C57BL6 WT mice and the knock-in mouse strain (B6; 129P2-Gpr15tm1.1Litt/J) at the age of 7 to 10 weeks to induce viral myocarditis in our studies. Primary murine cardiac fibroblasts were obtained from male WT B6 mice at the age of 10-12 weeks. Primary lymphocytes from spleen were isolated from male WT and GPR15-deficient B6 mice at the age of 8-16 weeks. All mice were kept under pathogen-free conditions in the laboratory animal facility University Hospital Hamburg-Eppendorf at 22°C with a 12 hour light/dark cycle and free access to water and standard laboratory chow. |
|--------------------|------------------------------------------------------------------------------------------------------------------------------------------------------------------------------------------------------------------------------------------------------------------------------------------------------------------------------------------------------------------------------------------------------------------------------------------------------------------------------------------------------------------------------------------------------------------------------------------------------|

|                         |                                                                                                                                                                                                                                                                     |
|-------------------------|---------------------------------------------------------------------------------------------------------------------------------------------------------------------------------------------------------------------------------------------------------------------|
| Wild animals            | This study did not include wild animals.                                                                                                                                                                                                                            |
| Reporting on sex        | Male mice were exclusively used in this study.                                                                                                                                                                                                                      |
| Field-collected samples | This study did not involve samples collected from the field.                                                                                                                                                                                                        |
| Ethics oversight        | All animal experiments were approved by the local bioethics committee of Hamburg, Germany (G13/115, G15/060, N060/2020, ORG821, ORG1068) and conform to the "Guide for the Care and Use of Laboratory Animals" published by the US NRC (8th edition, revised 2011). |

Note that full information on the approval of the study protocol must also be provided in the manuscript.

## Plants

|                       |     |
|-----------------------|-----|
| Seed stocks           | N/A |
| Novel plant genotypes | N/A |
| Authentication        | N/A |

## Flow Cytometry

### Plots

Confirm that:

- The axis labels state the marker and fluorochrome used (e.g. CD4-FITC).
- The axis scales are clearly visible. Include numbers along axes only for bottom left plot of group (a 'group' is an analysis of identical markers).
- All plots are contour plots with outliers or pseudocolor plots.
- A numerical value for number of cells or percentage (with statistics) is provided.

### Methodology

|                           |                                                                                                                                                                                                                                                                                                                                                                                                                                                                                                                                                                                                                                                                                                                                                                                                                                                                                                                                                                                                                                                                                                                                                                                                                                                                                                                                                                     |
|---------------------------|---------------------------------------------------------------------------------------------------------------------------------------------------------------------------------------------------------------------------------------------------------------------------------------------------------------------------------------------------------------------------------------------------------------------------------------------------------------------------------------------------------------------------------------------------------------------------------------------------------------------------------------------------------------------------------------------------------------------------------------------------------------------------------------------------------------------------------------------------------------------------------------------------------------------------------------------------------------------------------------------------------------------------------------------------------------------------------------------------------------------------------------------------------------------------------------------------------------------------------------------------------------------------------------------------------------------------------------------------------------------|
| Sample preparation        | Cells are freshly isolated from mice spleens and stained with the indicated antibodies prior to FACS analyses.                                                                                                                                                                                                                                                                                                                                                                                                                                                                                                                                                                                                                                                                                                                                                                                                                                                                                                                                                                                                                                                                                                                                                                                                                                                      |
| Instrument                | Flow cytometry analysis was performed on LSR Fortessa™, FACSCanto and a FACSCanto II, BD. Sorting was performed on ARIAIII, BD                                                                                                                                                                                                                                                                                                                                                                                                                                                                                                                                                                                                                                                                                                                                                                                                                                                                                                                                                                                                                                                                                                                                                                                                                                      |
| Software                  | Data were collected using BD FACS diva software. Flow cytometry data were analysed using FCSalyzer or FlowJo software.                                                                                                                                                                                                                                                                                                                                                                                                                                                                                                                                                                                                                                                                                                                                                                                                                                                                                                                                                                                                                                                                                                                                                                                                                                              |
| Cell population abundance | Abundance of T-cell subtypes is given for sorting experiments in the supplemental part.<br>Sorting of splenocytes: The percentages of the populations are: CD4-CD8-, DN: 59.7 ± 0.7 %; CD8+ TC: 9.7 ± 1.4 %; CD4+CD25- TH: 10.5 ± 0.4 % and CD4+CD25+ Treg: 0.9 ± 0.2 %.<br>Sorting of T cells:<br>The percentages of the populations for stimulated cells are: CD4-CD8-, DN: 2.1 ± 0.7 of CD3+ cells; CD8+: 50.0 ± 5.3 of CD3+ cells; CD4+CD25- 27.7 ± 15.7 of CD4+ cells; CD4+CD25+ 60.7 ± 25.0 of CD4+ cells<br>The percentages of the for unstimulated cells populations are: CD4-CD8-, DN: 2.7 ± 0.2 of CD3+ cells; CD8+: 40.8 ± 4.4 of CD3+ cells; CD4+CD25- 95.3 ± 0.9 of CD4+ cells; CD4+CD25+ 2.6 ± 1.5 of CD4+ cells                                                                                                                                                                                                                                                                                                                                                                                                                                                                                                                                                                                                                                      |
| Gating strategy           | All gating strategies are defined in the supplemental part for each experiment.<br>Gating strategy to sort splenocytes or to quantify GFP+ cells: Lymphocytes were gated via FSC and SSC and duplicates were excluded. Based on the obtained cell population of single lymphocytes, the following immune cell subtypes were sorted with primary fluorescence-labelled antibodies: double negative (CD4-CD8-, DN). lymphocytes, CD8+ TC, CD4+CD25- TH and CD4+CD25+ Treg cells.<br>Gating strategy to gate T cell subsets after phalloidin assay: Lymphocytes were gated via FSC and SSC and duplicates were excluded. Viable T cells were separated in CD8+ and CD4+ cells, which were further subdivided in CD4+CD25+ and CD4+CD25- cells.<br>Gating strategy to gate T cell subsets after IFN $\gamma$ secretion assay: Lymphocytes were gated via FSC and SSC and duplicates were excluded. Viable CD3+ T cell singlets were separated in CD8+ and CD4+ cells, which were further subdivided in CD4+CD25+ and CD4+CD25- cells. For each T cell subsets, proportion of IFN $\gamma$ + cells was determined<br>Gating strategy to gate T cell subsets after stimulation with Dynabeads and GPR15L: Lymphocytes were gated via FSC and SSC and duplicates were excluded. Viable T cells were separated in CD8+ and CD4+ cells, which were further subdivided in CD4 |

+CD25+ and CD4+CD25- cells.

Tick this box to confirm that a figure exemplifying the gating strategy is provided in the Supplementary Information.
